# Supplementary material for: MR1 rs2236410 mediates the regulation of mucosal-associated invariant T cells against graft-versus-host disease
Source: Research Square preprint supplement (doi:10.21203/rs.3.rs-2873424/v1), 2023-05-12
Supplement: Supplementary file 1 [file 872c29ec0499a8c1dee5e981.pdf]

**Table 2 Analysis of correlation between genotypes and related clinical events.**

| <b>Characteristics</b>                     | <b>A/A</b> | <b>A/G</b> | <b>P value</b>    |
|--------------------------------------------|------------|------------|-------------------|
| <b>Donors</b>                              | 90(47.6%)  | 99(52.4%)  | 0.988             |
| Male                                       | 61(32.3%)  | 67(35.4%)  |                   |
| Female                                     | 29(15.3%)  | 32(16.9%)  |                   |
| <b>Pre-HCST Patients</b>                   | 63(36.4%)  | 110(63.6%) | <b>&lt; 0.001</b> |
| Male                                       | 42(24.3%)  | 63(36.4%)  |                   |
| Female                                     | 21(12.1%)  | 47(27.2%)  |                   |
| <b>Donor PB-MAIT ratio (% CD3+T cells)</b> |            |            | <b>0.013</b>      |
| ≥2.47% (median value)*                     | 33(19.5%)  | 53(31.4%)  |                   |
| <2.47%                                     | 47 (27.8%) | 36 (21.3%) |                   |
| <b>Donor BM-MAIT ratio (% CD3+T cells)</b> |            |            | 0.285             |
| ≥3.655% (median value)**                   | 25(22.3%)  | 31(27.7%)  |                   |
| <3.655%                                    | 29(25.9%)  | 27(24.1%)  |                   |
| <b>Acute GVHD</b>                          | 34(18.0%)  | 40(21.2%)  | 0.712             |
| Skin aGVHD                                 | 25(13.2%)  | 29(15.3%)  | 0.818             |
| Gut aGVHD                                  | 16(8.5%)   | 9(4.8%)    | <b>0.061</b>      |
| Liver aGVHD                                | 5 (2.6%)   | 3 (1.6%)   | 0.389             |
| <b>Acute GVHD grade</b>                    |            |            |                   |
| I                                          | 8 (4.2%)   | 21 (11.1%) | <b>0.019</b>      |
| II to IV                                   | 27 (14.3%) | 19 (10.1%) | <b>0.059</b>      |
| <b>Chronic GVHD</b>                        | 7 (3.7%)   | 5 (2.6%)   | 0.319             |
| <b>Relapse</b>                             | 7 (3.7%)   | 9 (4.8%)   | 0.746             |
| <b>Death</b>                               | 7 (3.7%)   | 7 (3.7%)   | 0.853             |

\* According to the median value of MAIT proportion (% CD3+T cells) in PB of 169 enrolled donors, they were divided into high MAIT proportion group (≥2.47%) and low MAIT proportion group(<2.47%).

\*\* According to the median value of MAIT proportion (% CD3+T cells) in BM of 113 enrolled donors, they were divided into high MAIT proportion group (≥3.655%) and low MAIT proportion group(<3.655%).
